# Supplementary material for: MCL1 participates in leptin-promoted mitochondrial fusion and contributes to drug resistance in gallbladder cancer
Source: JCI journal article supplement (doi:10.1172/jci.insight.135438), 2021-06-22
Supplement: sd1 [file 1]

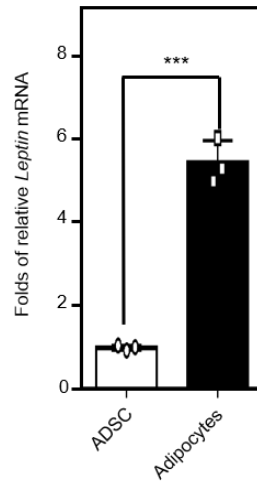

**Supplementary Figure 1. *Leptin* transcripts are abundant in human adipocytes.**

qPCR assay was conducted with total RNAs harvested from mesenchymal stem cells and adipocytes. n=3, 2-tailed Student's t-test. \*\*\*, significant difference ( $P < 0.001$ ).

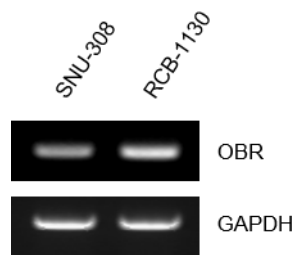

**Supplementary Figure 2. OBR is expressed in gallbladder cancer cells.**

RT-PCR assay was conducted with total RNA harvested from SNU-308 and RCB-1130 gallbladder cancer cells.

(n=3)

**A**

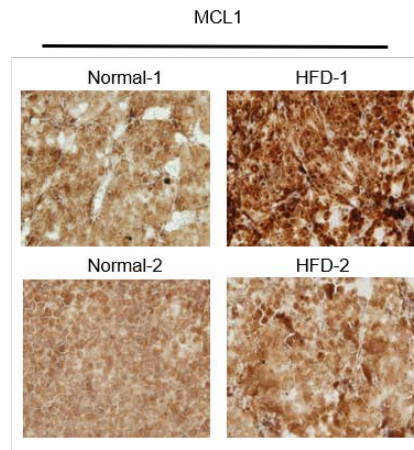

**B**

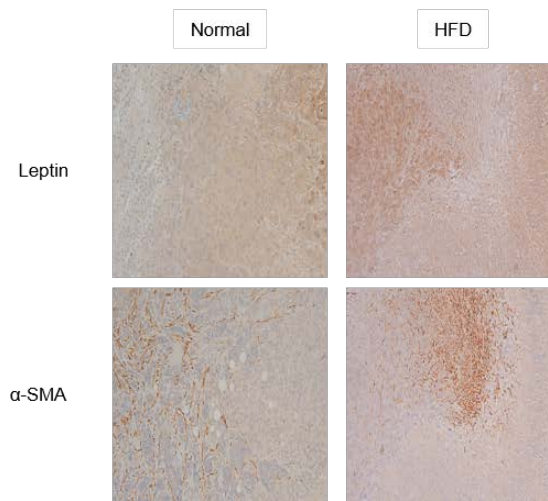

**Supplementary Figure 3. MCL1 expression is induced in the tumor xenografts of HFD-treated mice.**

A, MCL-1 expression is higher in RCB-1130 xenograft HFD-treated obese NOD/SCID mice. After injecting gallbladder cancer RCB-1130 cells into normal and HFD-treated obese mice for 4 weeks, the xenograft mice were sacrificed to extract tumor xenografts. MCL-1 protein expression was then examined by immunohistochemistry. (n=4)

B, The expressions of leptin (an adipocyte marker) and  $\alpha$ -SMA (a fibroblast marker) are marginally induced in the HFD-treated tumor xenografts. The leptin and  $\alpha$ -SMA protein expressions were then examined by immunohistochemistry. (n=4)

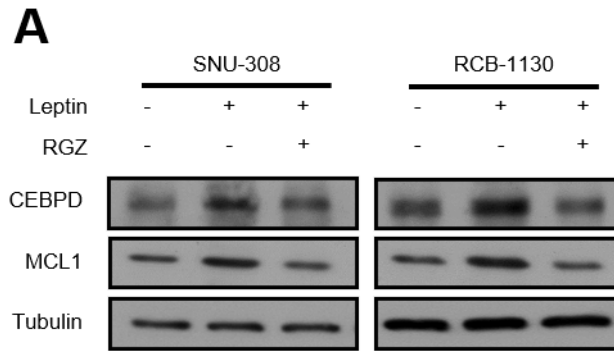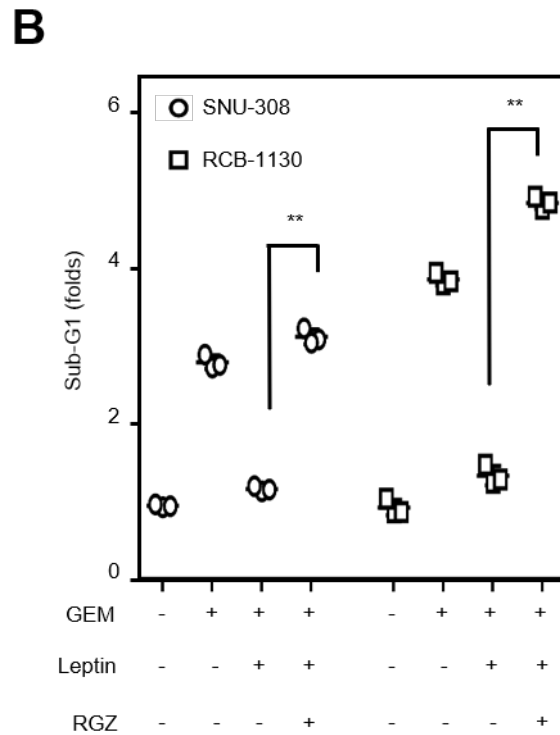

**Supplementary Figure 4. PPAR $\gamma$  agonist rosiglitazone suppresses leptin-induced CEBPD and MCL1 expression and enhances GBC cells sensitivity to gemcitabine.**

A, PPAR $\gamma$  agonist rosiglitazone (RGZ) inhibits leptin-induced pathway in GBC cells. A Western blot was conducted using lysates of leptin-treated alone or in combination treatment with RGZ in SNU-308 and RCB-1130 cells and detected with indicated specific CEBPD, MCL1 and  $\alpha$ -tubulin antibodies. (n=3)

B, RGZ enhances GBC cells sensitivity to GEM. SNU-308 and RCB-1130 cells were treated with GEM alone or in combination treatment with leptin or RGZ. n=3, 2-tailed Student's t-test.

**Supplementary Table 1. Correlation of pSTAT3, CEBPD and MCL1 expression with clinicopathological features in gallbladder cancer specimens.**

| characteristic                           | Case No. | <i>pSTAT3</i> |       |          | <i>CEBPD</i> |       |          | <i>MCL1</i> |       |          |
|------------------------------------------|----------|---------------|-------|----------|--------------|-------|----------|-------------|-------|----------|
|                                          |          | -/+           | +/+/+ | <i>p</i> | -/+          | +/+/+ | <i>p</i> | -/+         | +/+/+ | <i>p</i> |
| <b>Age</b>                               |          |               |       |          |              |       |          |             |       |          |
| <63                                      | 33       | 13            | 20    |          | 15           | 18    |          | 16          | 17    |          |
| ≥63                                      | 42       | 18            | 24    | 0.762    | 21           | 21    | 0.696    | 21          | 21    | 0.896    |
| <b>Gender</b>                            |          |               |       |          |              |       |          |             |       |          |
| Male                                     | 21       | 11            | 10    |          | 13           | 8     |          | 14          | 7     |          |
| Female                                   | 54       | 20            | 34    | 0.226    | 23           | 31    | 0.133    | 23          | 31    | 0.061    |
| <b>Tumor differentiation</b>             |          |               |       |          |              |       |          |             |       |          |
| Well/moderate                            | 40       | 19            | 21    |          | 23           | 17    |          | 24          | 16    |          |
| Poor                                     | 35       | 12            | 23    | 0.246    | 13           | 22    | 0.078    | 13          | 22    | 0.048    |
| <b>TNM stage (AJCC)</b>                  |          |               |       |          |              |       |          |             |       |          |
| I/II                                     | 29       | 21            | 8     |          | 27           | 2     |          | 24          | 5     |          |
| III/IV                                   | 46       | 10            | 36    | < 0.0001 | 9            | 37    | < 0.0001 | 13          | 33    | < 0.0001 |
| <b>Metastasis</b>                        |          |               |       |          |              |       |          |             |       |          |
| Present                                  | 40       | 10            | 30    |          | 9            | 31    |          | 12          | 28    |          |
| Absent                                   | 35       | 21            | 14    | 0.002    | 27           | 8     | < 0.0001 | 25          | 10    | 3E-04    |
| <b>Microvascular and Neural invasion</b> |          |               |       |          |              |       |          |             |       |          |
| Present                                  | 42       | 17            | 25    |          | 16           | 26    |          | 18          | 24    |          |
| Absent                                   | 33       | 14            | 19    | 0.865    | 20           | 13    | 0.053    | 19          | 14    | 0.206    |
